# Supplementary material for: Plasma concentration of neurofilament light chain protein decreases after switching from tenofovir disoproxil fumarate to tenofovir alafenamide fumarate
Source: PLoS One. 2019 Dec 11;14(12):e0226276. doi: 10.1371/journal.pone.0226276 (PMC6905536; doi:10.1371/journal.pone.0226276)
Supplement: S1 File — Included in the supporting information is an excel file with the complete dataset used for analysis. (XLSX) [file pone.0226276.s001.xlsx]

## Sheet: Data
Patient ID	Age	Sex	Group	BL	BL	BL	w24	w24	w24	w84	w84	w84
				S-creat	GFR	NFL (pg/mL)	S-creat	GFR	NFL (pg/mL)	S-creat	GFR	NFL (pg/mL)
1	32	1	1	1.21	102.9	8.80742	1.14	115.1	11.2166	1.13	114.9	7.68818
2	41	1	1	1.39	65	10.3133	1.33	69	16.7201	1.21	77.9	7.62587
3	47	1	1	0.94	141.5	11.047	1.01	132	10.5459	0.77	185.3	9.84741
4	24	1	1	1.05	99.3	3.29377	0.94	108.6	6.26425	0.88	123.8	2.9745
5	43	1	1	0.85	113.6	15.0913	0.89	110.7	14.7069	0.65	142.5	16.2007
6	33	1	1	1.18	78.8	9.3974	1.23	76.7	12.9294	1.14	81.7	8.33195
7	29	1	1	1.17	107.5	8.30808	1.29	98.8	7.68712	1.23	106.1	9.46654
8	48	1	1	1.11	114.3	8.91301	1.17	107.8	9.62971	1.23	100.5	13.952
9	41	1	1	1.01	92.6	6.69374	1.08	89.7	10.4741	1.19	83.1	5.24554
10	40	1	1	1.04	103.1	12.5695	1.05	102.8	12.9237	0.92	120.3	11.5439
11	50	1	1	0.99	151.1	7.1943	0.99	152.4	5.79031	0.92	153.6	9.33087
12	50	1	1	1.28	69.8	14.8912	1.1	84.6	168.794	1.17	79.4	10.6301
13	47	1	1	1.2	80.1	9.54539	1.09	89.7	8.7837	0.81	115.2	12.5088
14	42	1	1	0.95	109.3	6.94652	0.92	107.6	7.29937	1.2	79.7	8.00141
15	31	1	1	1.28	88	7.07842	1.3	86.2	10.4155	1.38	81.8	9.6349
16	30	1	1	0.97	201.9	4.41129	1.27	154.4	4.96674	0.87	217.6	4.01408
17	29	1	1	1.03	74.7	6.98215	1.04	80	12.2271	1.03	90.8	8.85496
18	39	1	1	1.25	95.2	9.59068	1.23	98.8	8.13435	1.07	114.8	7.084
19	53	1	1	1.06	119.2	9.31864	1.14	109.8	7.26753	1.06	109.2	6.24591
20	24	1	1	0.92	112.1	11.1513	1.06	101.1	11.8083	1	107.7	11.2176
21	57	0	1	0.78	123.1	7.33952	0.71	139.6	7.83684	0.77	145.3	8.21425
22	38	1	1	0.94	126.6	8.91334	1.04	115.6	6.65334	0.97	124.3	7.42895
23	51	1	1	1.12	89.3	7.69396	1.12	87.1	6.73631	1.01	97.7	8.52414
24	40	1	1	1.28	70.5	21.1552	1.06	89.5	12.9733	1.08	90.7	15.1798
25	47	1	1	1.03	213.8	6.11974	1.11	207.1	5.89466	0.95	225.7	7.78256
26	42	1	1	1.27	118.5	8.33021	1.08	141.2	4.23263	1.18	125.3	7.51512
27	41	1	1	1.31	70.4	10.274	1.14	84.2	12.009	1.14	94.2	15.0177
28	33	1	1	1.25	91.1	7.04603	1.04	112.4	4.79284	1.09	112.9	5.08049
29	40	1	1	1.04	185.4	4.23825	0.99	185.1	6.66884	0.9	209.2	6.12277
30	35	1	1	1.11	106.7	17.1289	1.26	96.2	13.3195	1.11	106.2	12.5597
31	52	1	1	0.97	102.8	12.5444	0.87	119	10.0012	1.04	100.5	9.29617
32	47	1	1	1.31	99.5	12.9547	1.28	93.3	14.6594	1.19	89.1	11.336
33	24	1	1	1.23	81.3	14.2614	1.24	80.1	12.9884	1.19	83	11.2988
34	42	1	1	1.4	76.7	16.4077	1.25	84.1	14.2536	1.16	97	10.9292
35	53	1	1	0.97	89.8	14.6221	0.99	85.8	15.6519	0.78	109	17.26
36	56	1	1	1.15	106.7	14.6546	1.15	113.6	12.6634	1.29	95.3	11.713
37	54	1	1	1.01	105.6	8.24518	0.99	111.6	9.70018	1.02	107.7	7.22443
38	35	0	1	1.15	100.1	15.6805	1.13	102.5	11.6859	1.25	94.3	15.2638
39	45	1	1	0.95	149.9	5.71243	0.94	148.4	11.1992	0.91	144.5	12.5461
40	46	1	1	1.03	103.9	5.25831	0.98	109.4	5.95289	1.13	94.3	6.60847
41	37	0	1	1.25	63.5	12.0734	1.13	70.7	11.3813	0.9	95.8	10.9328
42	27	0	1	0.83	109.3	9.65836	0.88	101.7	9.90051	0.83	96.9	10.4479
43	43	1	1	0.97	118.5	7.44121	0.92	123.6	9.94169	0.91	127.6	10.3204
44	39	0	1	0.8	130.3	7.17244	0.77	141.5	3.8473	0.79	145.6	7.99945
45	32	1	1	1.13	111.6	5.67311	1.07	112.9	5.42911	0.93	122.8	4.33446
46	35	1	1	1.02	153	6.59193	1	136.9	10.1861	0.88	141.6	9.92002
47	55	1	1	0.88	121	5.46488	0.87	124.3	9.78271
48	56	1	1	1.2	75	13.7468	1.21	76	14.075	1.11	84.6	16.443
49	58	1	1	0.78	101.8	12.0394	0.64	114.6	11.9367	0.75	110.1	10.4475
50	43	1	1	1.07	100.5	10.4719	1.18	93.3	9.45583	1.08	98.1	9.94982
51	36	1	1	1.12	112.8	10.2236	1.17	103.6	5.67042	1.15	107.5	7.4513
52	35	1	1	1.3	93.1	10.5216	1.24	95.5	10.5562	1.19	98	9.08779
53	26	1	1	1.14	107.1	9.83969	1.29	97.1	10.1588	1.15	106.5	10.6139
54	32	0	1	0.8	99	8.78348	0.78	101.4	2.76701	0.67	121.2	5.08116
55	50	1	1	1.39	109.3	2.5807	1.32	114.2	1.75862	1.23	113.4	2.33841
56	35	1	1	1.13	88.9	10.7957	1.31	77.1	7.15087	1.12	95.4	5.70265
57	55	0	1	0.68	104.5	14.3063	0.62	116.7	13.1138	0.57	128.6	15.7534
58	27	1	1	1.06	159.2	3.36173	1.02	171.6	2.37803	0.99	173.8	3.81651
59	51	1	1	1.04	80.3	12.2293	0.93	91.3	12.3917	0.86	94.4	10.8593
60	25	1	1	0.99	152	3.47581	1	156.6	3.75854	1.18	138.7	4.74561
61	52	1	1	1.04	99.7	4.66166	1.15	90.5	7.16408	1.03	99.8	5.27401
62	49	1	1	1.24	80.8	9.48955	0.95	105.5	9.11219	0.93	92.2	9.53489
63	47	1	1	1.29	64.4	11.4655	1.39	58.9	13.4862	1.3	73.9	8.61151
64	48	1	1	0.98	104	9.48904	0.9	115.4	12.1897	0.86	126.2	7.33436
65	24	1	1	0.73	210.1	4.00292	0.82	188.8	4.0786	0.83	183.2	5.0518
66	52	1	1	0.96	111.4	8.48325	0.89	122.6	7.7758	0.98	112.3	8.50969
67	37	1	1	1.58	63.6	16.2877	1.25	81.9	9.04725	1.13	85.3	14.8339
68	28	1	1	1.05	99.6	8.87904	1.1	96.4	8.91255	1.04	97.2	8.75804
69	34	1	1	0.9	124.6	5.86496	0.86	133.8	6.2604	0.82	140.7	4.3743
70	29	1	1	1.05	143.3	6.06	0.93	165.4	6.23405	1.03	156.3	6.98999
71	41	1	1	1.29	124.7	10.7516	0.87	172.4	8.70436	0.95	162.7	15.4681
72	46	1	1	0.97	99.5	18.7365	0.93	107	9.88933	0.89	107.4	14.3008
73	46	1	1	1.29	94	16.0917	1.27	100.2	12.5725	1.11	111	11.9364
74	52	1	1	1.06	85.8	15.2986	1.12	82.2	15.0849	1.18	82.3	11.7039
75	47	1	1	1	100.2	14.4816	1.13	88.4	10.7912	1.15	85.8	12.6581
76	52	1	1	1.25	110.9	17.896	1.21	109.8	16.0525	1.12	126.8	14.685
77	37	1	1	1.11	105.2	7.92958	1.02	111.4	9.71265	1.12	100.9	7.90813
78	50	0	1	0.79	94.7	13.7381	0.87	85.5	10.7044	0.89	86.2	12.6293
79	27	1	1	1.19	75.3	7.66738	1.05	85.9	6.90662	1.06	85.1	7.99293
80	32	1	1	1.21	95.1	8.90398	1.1	102.7	8.07409	1.04	107.7	7.25636
81	24	1	1	0.87	115.7	6.77989	0.8	122.2	6.83073	0.95	112.6	4.2074
82	35	1	1	1.12	143	4.86911	1.04	163.5	4.34115	0.9	187.6	5.87882
83	47	1	1	1.57	75.4	16.8944	1.32	88.8	20.8911	1.12	106.4	28.0597
84	62	1	1	1.1	71.2	15.5729	1.13	71	13.9962	1.02	77.6	15.2579
85	41Q	1	1	1.19	93.5	8.35487	0.99	116	8.48258	1.06	103.6	8.22912
86	30	1	1	1.03	117.8	6.85737	0.92	136.3	9.88289	0.79	149.5	7.76511
87	53	0	1	0.66	98.8	5.9116	0.77	86.1	7.76345	0.66	95.8	8.90657
88	38	1	1	1.22	73.7	9.47386	1.39	62.3	12.5118			8.03306
89	45	1	1	1	100.7	14.9603	0.97	111.4	11.5585	0.92	113	10.5867
90	42	1	1	1.14	138	4.39448	1.07	152.9	4.43101	0.87	177.6	4.58025
91	22	1	1	1.09	99.5	5.31793	0.95	114.8	4.14588	0.81	137	4.60151
92	30	1	1	1.33	74.7	15.8182	1.34	73.3	14.0688	1.23	82.7	16.7074
93	46	1	1	1.03	139.7	13.8944	0.97	141.1	19.3736	0.89	156.7	15.0791
94	34	1	1	0.86	133.9	5.67708	0.85	129.7	7.31399	0.92	127.2	7.86767
95	45	1	1	0.95	92.1	8.33592	0.99	87.7	8.4929	1.03	89.3	5.93276
96	33	1	1	1.23	87.2	7.32643	1.24	87.3	10.6646	1.09	101.3	9.6379
97	61	1	1	1.11	82.4	15.5902	1	88	17.8442	0.96	89	21.6501
98	27	1	1	1.17	93.9	9.54808	1.21	96.2	8.26188	1.13	100.5	8.94604
99	45	0	1	0.67	132.1	3.87816	0.74	120.9	4.48782	0.69	125.4	4.64401
100	29	1	1	1.33	95.7	12.525	1.19	105.4	13.5165	1.13	120.6	11.7175
101	30	1	1	1.12	119.6	5.06945	1.03	138.6	4.97384	1.11	132	4.81158
102	40	1	1	1.2	105.2	11.3018	1.06	124.3	13.1573	1.12	112.4	8.3843
103	23	1	1	1.1	174.2	4.26413	1.14	170.8	4.49844	1.18	158.7	6.01678
104	50	1	1	0.67	97.4	15.0253	0.72	96	9.9779	0.69	97.5	12.8069
105	49	1	1	1.02	98.3	10.1176	1.11	90.4	9.77598	1.01	99.4	7.13062
106	33	1	1	0.71	234.2	6.19558	0.71	248.4	5.21346	0.81	202.2	8.6077
107	26	1	1	0.85	182	6.06803	1.08	147.6	5.69474	0.9	182.8	6.20545
108	38	1	1	1.43	72.7	18.5559	1.16	87.3	31.9781	1.45	74.3	9.38991
109	54	1	1	0.88	104.6	9.78612	0.88	107	9.35639	0.77	119	9.48435
110	40	1	1	1.1	166.7	5.91538	1.27	155.6	8.63491	1.33	145.7	6.17329
111	42	1	1	1.79	94	9.5106	1.9	93	7.85241	1.81	100	6.31556
112	49	1	1	0.94	100	13.668	1.03	92	13.2371	1.02	95.4	12.4363
113	52	1	1	0.98	105.8	14.9917	1.01	103.1	15.7243	0.72	144.5	14.6249
114	40	1	1	0.95	138.6	11.9909	1.17	116.8	9.51189	0.96	135.3	14.0172
115	47	1	1	1.06	125.4	9.32833	1.08	124.1	11.506	0.95	127.1	10.2626
116	38	0	1	0.79	156.1	5.83202	0.86	149.7	6.08436	0.58	184	6.19349
117	40	1	1	1.41	87.1	9.64852	1.51	82.1	10.5677	1.5	80.5	12.0082
118	33	1	1	0.89	132.4	6.68589	0.87	144.9	6.1653	0.83	150.4	7.17303
119	39	1	1	1.05	113.6	5.5978	0.92	127.3	7.12116	0.92	130	7.05236
120	40	1	1	1.34	88.1	8.66435	1.28	96.5	9.1773	1.21	94.2	9.41702
121	61	1	1	1.04	85.7	40.2382	1.12	76.3	15.3427	1.05	84.5	17.1903
122	29	1	1	1.1	84	6.19575	0.92	100.8	4.16184	0.92	97.1	5.17873
123	40	1	1	1.09	106.9	8.15307	0.96	128	9.1476	0.8	151.3	6.8873
124	56	1	1	1.26	85.5	18.9015	1.24	91.5	20.606	1.28	98.9	16.4553
125	48	1	1	1.01	127.7	9.3786	1.08	123.6	8.83203	0.96	140.9	8.15349
126	22	1	1	1.02	118.9	7.01849	1.01	123.4	6.3126	1	126.5	5.87873
127	64	1	1	1.32	68.9	12.5356	1.23	74	12.7238	1.14	75.6	13.142
128	42	1	1	1.25	82.5	16.6168	1.15	89	18.7412	1.26	78.2	19.0093
129	40	1	1	0.77	135.5	18.0142	0.74	152.4	8.20708	0.72	167.3	9.14778
130	49	1	1	0.77	117.5	8.66034	0.84	110	8.39205	0.81	118.7	8.01222
131	30	1	1	1.05	124.6	9.46697	0.97	132.8	6.9117	0.97	122.8	4.92393
132	26	1	1	1.03	163.6	6.68545	0.95	178.3	14.134	0.88	188.6	4.18579
133	24	1	1	1.28	128.5	13.674	1.16	153.1	17.3915	1.1	152.3	13.0144
134	29	0	1	0.99	96.5	7.77506	0.81	117	8.52163	0.96	105.5	10.2159
135	31	1	1	1.28	78.1	10.569	1.22	89.7	10.153	1.26	86.9	10.0478
136	57	1	1	1.02	99	12.0991	1.17	83.3	9.28917	1.06	97	6.97107
137	38	1	1	2.16	77	10.4047	1.72	96	8.39374	1.6	97	7.40551
138	47	1	1	1.31	75.1	19.5349	1.32	75.1	35.6217	1.17	92.2	11.3067
139	35	1	1	1.04	127.2	13.1744	1.06	119.8	10.4813	0.96	128.3	13.066
140	57	1	1	1.13	86.1	10.7463	1.17	83.9	7.56927	1.07	87.7	7.65332
141	34	1	1	0.79	223.6	7.13935	0.81	220.6	6.63909	0.81	230.9	6.13284
142	46	0	1	0.86	103.9	3.48964	0.84	99.9	3.70831	0.83	102.9	2.69176
143	40	0	1	0.92	178.2	6.63405	0.88	187.4	5.55567	0.97	164	8.13831
144	51	1	1	1.25	75.9	11.207	1.28	74.9	14.4763	1.18	80.5	19.0412
145	42	1	1	1.13	95.2	7.70993	0.9	119.5	6.75686
146	45	1	1	1.24	84.9	8.16337	1.05	101	7.45809	0.94	106.6	7.39765
147	51	0	1	0.8	127.3	8.34954	0.72	139.8	9.14808	0.72	139.9	9.81248
148	49	1	1	1.67	67.4	8.4229	1.35	87.4	12.9278	1.26	91.4	5.92945
149	55	1	1	1.17	94.2	56.859	1.05	106.6	64.8672	1.04	103.2	45.6678
150	35	1	1	1.03	115.5	9.24393	0.98	129.6	10.8789	0.89	130	13.0526
151	32	1	1	1.23	80	10.9233	1.25	82.2	10.7582	1.39	79.4	8.84521
152	54	1	1	1.15	74.8	9.53337	1.4	60.5	8.61854	1.13	80	8.61215
153	59	1	1	1.22	104.6	16.0815	1.2	106.7	12.1969	1.04	122	11.8954
154	48	1	1	0.76	120.7	13.765	0.91	102.1	10.9594	0.79	117.1	10.7962
155	45	1	1	1.59	95.3	7.52317	1.18	129.9	7.90906	0.95	159.2	6.53123
156	41	1	1	1.1	104.4	13.6139	1.15	101.4	12.0366	1.1	102.8	11.8869
157	48	1	1	0.94	103.6	9.17858	0.97	100.4	9.23154	0.91	111.1	11.7148
158	32	1	1	1.18	76.8	14.0034	0.96	97.5	10.6321	0.94	92.2	10.3736
159	50	1	1	1.11	87.8	8.69186	0.97	104	5.44043	0.91	115.1	8.06956
160	30	1	1	1.15	112.8	8.56687	1.15	114.4	13.1288	1.12	124.8	8.40192
161	34	1	1	1.17	110.9	11.1576	1.03	131.9	11.7806	1.28	98.3	8.75926
162	40	1	1	1.31	114.4	7.10781	1.36	117.6	6.36993	1.24	140.4	5.14462
163	27	1	1	1.26	93.4	38.9777	1.12	114.3	14.2971	1.2	111.7	6.71941
164	36	1	1	0.99	216.5	6.28776	0.85	237.6	6.02164	1	212.2	6.91393
165	46	1	1	1.24	75.9	11.6544	1.17	83	7.95938	1.07	92.1	15.0136
166	39	1	1	1.1	120.1	6.93474				1.1	121.1	7.75324
167	46	0	1	0.95	89	12.117	0.91	99.5	11.7218	0.77	116.2	10.0113
168	24	1	1	0.91	164.8	3.60743	1	156.5	3.40515	0.92	174.9	4.26673
169	32	1	1	1.12	111.4	11.9298	1.08	116.3	13.7937	1.06	121.9	10.4542
170	36	1	1	0.93	160	13.6542	0.95	173	6.26451	0.9	188.7	9.80541
171	29	1	1	0.87	130.2	5.24248	0.77	152	6.07283	0.85	155.8	4.06496
172	46	1	1	0.82	135.8	20.9529	0.82	141.5	17.829	0.95	120.8	9.55385
173	29	1	1	1.04	119.6	8.62102	1.08	121.9	7.28441	1.03	133.3	4.95066
174	31	1	1	0.96	123	8.38957	0.81	146.5	4.76557	0.91	151.9	7.7617
175	31	1	1	1.35	73.3	8.60039	1.07	90.3	8.41619	0.95	105.4	10.6324
176	25	1	1	1.26	96.5	8.36098	1.32	94.9	7.17567	1.3	94.5	6.99084
177	31	0	1	0.64	170.9	5.5395	0.6	185.1	5.62905	0.5	159.2	7.39559
178	44	1	1	1.1	98.4	10.4637	1.08	101.3	9.4986	1.02	107.6	10.633
179	48	1	1	1.11	102	9.63209	1.32	91	9.87975	1.49	84	10.5263
180	51	1	1	1.15	97.7	6.74063	1.16	106.3	7.26644	1.23	97	5.11092
181	30	1	1	0.92	130	7.14076	0.9	135.7	5.3058	0.91	127.1	7.17401
182	59	1	1	1.28	61.4	11.3476	1.29	57.7	14.5939	1.21	59	11.0228
183	32	1	1	1.21	102.3	6.30581	1.15	113.3	4.49179	1	127.1	4.95558
184	49	1	1	1.37	86	10.7318	1.5	82.5	7.81667	1.5	83.2	9.24618
185	31	1	1	1.21	104.3	8.67894	1.07	127.8	7.57367	1.05	119.9	7.75692
186	31	1	1	0.95	129.1	7.78912	1.2	103.6	7.04072	1.19	90.4	9.25087
187	51	1	1	0.97	81.3	13.5924	1	82.4	13.2336	0.94	96.4	10.7338
188	68	0	1	1.23	68.1	27.3515	0.97	84.2	16.1369	1.03	76.5	21.2625
189	33	1	1	1.36	104.7	7.87269	1.35	108.4	6.79724	1.25	116.9	7.98715
190	61	1	1	0.95	101.8	11.1085	1.02	99.6	11.9026	0.92	104.9	10.2215
191	54	1	1	1.02	96.8	13.4338	1.26	79.5	14.1023	0.96	103.3	10.9625
192	39	1	1	1.3	114.6	7.74869	1.21	122.2	13.5975	1.29	115.6	9.31914
193	43	0	1	1.45	76.8	14.1245	1.26	86.6	13.8806	1.12	94.3	13.6859
194	41	1	1	1.16	103.2	7.32785	1.15	97.6	9.49895	1.05	111.1	6.36986
195	53	1	1	1.23	80.9	14.5303	1.26	78.7	16.6666	1.28	78	12.2971
196	34	1	1	1.07	127	7.71931	1.12	120.2	7.7529	1.03	130.4	8.48665
197	31	1	1	0.99	120.2	4.54569	1.11	105.6	3.60006	0.91	133.8	4.61784
198	52	1	1	1.03	100.6	8.38878	0.98	106.6	9.57424	0.87	121.4	8.65736
199	26	1	1	0.99	95.8	9.17361	0.93	104.2	11.9831	0.95	103.4	9.36356
200	26	1	1	1.18	107.9	12.7965	1.05	118.2	18.0353
201	36	1	1	0.96	172	6.48449	0.99	170.3	7.92284	1.05	158.6	6.27883
202	51	1	1	1.13	103.2	7.70603	1.1	108.9	7.99693	1.04	114.5	10.0953
203	30	1	1	1.17	88.8	9.60015	1.14	98.9	7.00255	1.1	96.9	8.75558
204	49	1	1	1.23	91.8	9.8953	1.31	82.7	9.43686	1.28	87.2	10.1654
205	44	1	1	0.83	185.9	12.7533	0.83	181.7	60.2407	0.86	174.7	13.0913
206	25	1	1	0.9	119.4	13.7158	0.75	165.5	9.85518	0.64	191.8	15.1706
207	32	1	1	1.11	90.7	7.02088	1.12	88.7	7.41451	1.19	86	7.84187
208	43	1	1	1.21	78.5	7.27287	1.25	78.4	7.60813	1.12	88.4	8.90535
209	22	1	1	1.32	75.7	9.39591	1.18	85.7	10.4811	1.07	93.4	11.1412
210	48	1	1	1.39	82.1	8.52694	1.32	81.4	10.4275	1.05	97.1	13.1285
211	39	1	1	1.08	124.3	7.15657	1.15	118.9	6.81893	0.93	142.9	7.27419
212	23	1	1	1.08	102.3	4.67588	1.05	105.7	6.22332	1.06	101.9	7.34853
213	24	1	1	1.54	76	11.6966	1.5	73.6	8.1234	1.33	87.9	12.1362
214	54	1	1	0.97	115	14.0949	1.03	113.6	37.5971	0.86	132.3	13.643
215	36	1	1	0.7	184.9	6.31515	0.76	171.8	5.70798	0.61	221.8	4.57802
216	60	1	1	0.86	100.4	16.7098	0.85	100.3	14.3974	0.89	98.8	17.2586
217	32	1	1	1.58	91	6.98019	1.7	85	4.00977	1.71	87	6.45785
218	39	1	1	0.94	115.1	8.36119	0.87	133.6	7.04234	0.86	137	7.73406
219	58	1	1	1.15	101.6	8.85089	1.16	98.2	9.27183	1.18	102.4	11.3478
220	44	1	1	1.62	95	5.90126	1.51	100	54.5705	1.75	84	9.56666
221	38	0	1	2.04	61	4.52001	1.97	66	4.5845	1.83	78	4.56208
222	48	1	1	1.08	107.3	11.7747	1.06	107.2	13.8753	1.02	110.5	15.1783
223	67	1	1	1.32	67.6	16.8884	1.31	66.5	18.2441	1.23	70.6	21.3559
224	34	1	1	1.14	105.9	6.51694	0.87	136.4	4.23969	1.08	117.7	7.6219
225	22	1	1	1.04	105	10.4332	1.06	109.8	5.02957	1.13	107	6.74819
226	54	1	1	1.24	110	9.91564	1.27	107	9.216	1.47	92	8.73968
227	42	1	1	1.16	83.6	9.16743	1.12	88.2	8.99277	1.15	83.9	9.35688
228	32	1	1	0.91	106.9	18.1199	0.99	97.4	16.9821	1.11	96.8	9.02296
229	34	1	1	1.01	136.9	8.30604	1.19	121.7	7.31579	0.96	159.6	6.97769
230	51	1	1	1.21	107	12.2975	1.34	99	12.4582	1.46	90	10.7481
231	44	1	1	1.88	84	7.22906	1.79	89	5.98367	1.9	85	7.39324
232	65	1	1	1.72	91	17.4395	1.72	87	10.6513	1.71	91	8.4251
233	33	1	1	1.57	109	8.49426	1.85	93	7.1485			8.52992
234	37	1	1	1.15	93.3	7.53981	1.27	86.1	8.87435	1.07	104.5	7.96993
235	30	1	1	1.18	88	10.9416	1.07	96.4	10.4165	1.11	95.5	10.8181
236	30	1	1	1.08	81.3	10.6997	1.2	77.9	10.1886	0.65	152.3	12.3462
237	39	1	1	0.72	315.4	7.70902	0.76	302.2	5.38279	0.81	266.5	4.76362
238	28	1	1	1.37	104	4.91171	1.45	99	6.84992	1.39	102	5.46926
239	39	1	1	1.21	74.1	18.2319	1.05	92.3	16.2198	1.1	84.5	14.0416
240	45	1	1	1.82	90	6.30543	1.64	101	12.0363	1.97	86	6.31036
241	54	1	1	2.05	107	10.015	2.19	102	7.19387	2.14	102	7.81578
242	32	1	1	0.97	117.7	8.54811	0.89	124.2	6.97495	0.8	153.8	8.05989
243	44	1	1	1.56	91	13.5756	1.62	88	11.9832	1.64	88	13.7191
244	38	1	1	1.63	92	6.21735	1.72	86	8.2029	1.72	87	12.121
245	36	1	1	2.13	80	6.72784	2.22	79	4.58164	1.75	99	3.68193
246	53	1	1	3.33	69	4.26374	3.18	73	5.47838	4.09	56	5.81016
247	52	1	1	1.58	112	12.6518	1.61	111	12.2056	1.69	96	11.9328
248	43	1	1	1.95	90	6.38604	1.73	103	6.90158	2.11	86	5.08299
249	48	0	1	1.22	72	11.9533	1.57	60	11.9276	1.52	65	12.561
250	34	1	1	2.07	79	9.44489	1.96	81	10.3562	2.11	75	7.10695
251	29	1	1	1.88	92	9.16402	1.91	91	6.23166	2.03	88	4.93633
252	33	1	1	1.84	81	6.32187	1.78	86	6.64223	1.75	84	9.49142
253	53	1	1	2.02	92	9.40654	2.07	90	11.8778	1.9	93	8.47327
254	57	1	1	1.18	81.5	14.6455	1.2	79.3	14.1443	1.11	86.5	13.9678
255	39	1	1	2.22	74	11.8218	1.83	94	7.5879	1.9	90	9.57254
256	57	1	1	1.13	99	15.2076	1.1	99	15.7991	1.04	105	15.728
257	39	1	1	1.36	102	8.32299	1.62	87	7.76978	1.6	87	6.42394
258	40	1	1	1.6	100	8.33918	1.66	95	9.82399	1.66	101	9.74539
259	41	1	1	1.29	93	8.58855	1.38	87	14.91	1.27	91	10.0952
260	31	1	1	1.04	154.4	6.7994	1.21	139	5.19583	1.07	140.5	9.48238
261	34	1	1	1.28	74.1	8.72518	1.15	81.9	6.94366	1.17	81.6	7.57064
262	41	1	1	1.29	108	15.9946	1.42	102	12.8984	1.38	103	13.4326
263	32	1	1	1.86	85	3.8019	1.74	89	5.02811	1.89	87	4.14406
264	47	0	1	0.76	154.6	13.0938	0.98	118.6	12.2937
265	48	1	1	1.77	98	7.05782	1.86	93	5.84894	1.79	94	5.07483
266	48	1	1	0.92	76.5	24.1268	0.83	88.2	24.5486	0.98	72.1	29.4616
267	29	1	1	0.94	109.4	8.56124	0.95	106.1	11.6523	0.84	118.9	8.38244
268	38	1	1	2.77	63	5.47796	2.65	65	7.99492	2.62	65	6.26906
269	31	1	1	2.1	92	4.82821	2.03	91	6.43473	2.18	89	4.22805
270	43	1	1	1.6	77	7.49114	1.64	71	8.05996
271	35	0	1	1.46	67	9.0793	1.56	66	8.3401	1.51	70	9.22743
272	27	1	1	1.47	104	7.24286	1.49	101	17.815	1.47	109	7.93629
273	42	1	0	1.32	76.9	12.6158	1.43	67.4	13.3601	1.43	70.2	15.0736
274	26	1	0	1.26	89.5	5.2654	1.42	82.4	4.99668	1.17	101	4.6512
275	46	1	0	0.9	152	25.8533	1.01	134.8	20.3397	1.01	125.8	36.5786
276	45	1	0	1.06	92	14.3901				1.1	84.2	9.96316
277	51	1	0	1.02	114.6	11.5071	1.07	104	8.5101	1.01	104.3	9.09281
278	42	1	0	1.33	79.2	12.3059	1.44	77.3	16.0307	1.48	72.9	14.3728
279	31	1	0	0.78	170.8	5.56456	0.79	175.5	5.45542	0.76	175.6	6.09786
280	51	1	0	1.23	95.3	18.4557	1.21	94.4	31.2929	1.21	91.4	27.2598
281	58	1	0	1.01	102.3	12.6282	1.1	92.8	14.7388	0.97	99.2	15.408
282	33	1	0	1.14	104.3	9.59216	1.1	104.7	26.1534	1.14	98.9	14.9511
283	36	1	0	1.24	85	2.96041	1.59	65.1	4.98272	1.33	81	4.47196
284	53	1	0	1.16	112.9	8.15811	1.18	111.5	7.54198	1.2	101.7	9.5269
285	39	1	0	0.96	129.9	5.00691	0.99	113.8	5.26545	0.99	113.2	4.97884
286	32	1	0	0.92	157.5	10.1264	0.9	154.9	7.75042	0.86	153.6	10.3452
287	31	1	0	1.34	98.4	8.83722	1.12	123.8	5.66746	1.18	116.4	5.52417
288	42	0	0	0.82	173.4	10.2071	0.85	163.7	8.14887	0.8	173.8	8.34837
289	33	1	0	1.02	135.5	6.20255	1.1	130.6	3.62583	1.11	126.1	7.47705
290	25	1	0	1.56	65	9.94499	1.51	65.7	7.19058	1.56	65.8	6.09307
291	43	1	0	1.29	73.8	21.564	1.19	81.6	14.6644	1.36	72.3	17.087
292	24	1	0	1.09	136.7	4.20298	1.14	129.2	8.02347	1.05	145	4.76485
293	32	1	0	1.03	106.3	14.1905	1.38	85.9	14.6385	0.93	119	12.2938
294	48	1	0	1.23	120.5	10.0221	1.24	114.3	10.1542	1.26	113.6	7.55491
295	45	1	0	1.16	90.2	11.2574	1.19	87	11.4782	1.17	92.1	10.507
296	47	1	0	1.16	71.3	13.8315	1.14	74	10.126	1.2	68.6	16.9961
297	61	1	0	0.93	99.8	27.267	1	96	28.5222	1.03	93.1	30.309
298	29	1	0	0.96	123.8	7.33569	0.99	120.4	7.95687	0.85	138.9	8.22919
299	43	1	0	1.27	63	14.1033	1.28	62.3	19.8447	1.34	58.4	14.3804
300	44	1	0	1.41	75	10.0441	1.31	85.4	10.5648	1.29	89.5	9.31328
301	39	1	0	1.08	112	12.8114	1.12	105.1	11.191	0.99	117.8	14.4343
302	29	1	0	1.33	93.5	10.4985	1.37	90.7	9.9939	0.88	148.5	8.5934
303	31	1	0	0.95	144.5	9.94666	0.97	151.5	8.62535	1.04	131.5	7.82093
304	34	1	0	1.34	85.7	8.33679	1.43	81.2	9.39541	1.4	79.8	8.98726
305	47	1	0	1.12	69.1	21.0623	1	76.8	46.5664	1.05	63.9	26.0866
306	27	1	0	0.88	158.5	2.77181	0.72	182.3	5.40235	0.82	171.5	4.37975
307	41	1	0	0.91	93.8	11.1594	0.83	103.7	8.44095	0.93	86.4	11.9573
308	40	1	0	1.26	109.9	5.78831	1.33	110.8	7.09995	1.24	111.1	7.29528
309	64	1	0	1.06	95.7	16.4737	1.03	96.6	17.9605	1.15	93.6	25.5399
310	46	1	0	1.06	112.8	9.08064	1.27	93.2	8.39949	1.19	100.4	8.32471
311	55	1	0	1.28	97.5	21.6267	1.32	94.2	15.5521	1.05	113.5	20.8152
312	43	1	0	1.05	136	9.83423	1.01	147.3	11.298	0.94	161	10.1095
313	33	1	0	1.07	120.8	14.5683	1.12	113.8	16.5921	1	126.9	14.2746
314	46	1	0	1.27	85.4	12.7736	1.28	80.4	14.7606	1.23	86.5	8.21137
315	69	1	0	0.96	82	37.8318	1.01	82.3	17.1416	0.91	94.4	18.4146
316	25	1	0	1.19	99.1	11.6139	1.19	104.3	10.3991	1.42	84.2	13.1308
317	42	1	0	1.04	107.7	8.65747	1.02	112.7	6.45168	1.09	96.9	14.4577
318	29	1	0	1.47	107.9	6.7646	1.38	111.9	7.3148	1.44	109.7	6.76136
319	38	1	0	1.01	114.5	33.3508	1.23	95.5	9.9225	1.1	108.7	12.644
320	25	1	0	1.22	133.8	4.68355	1.29	129	3.37729	1.21	135.3	5.01332
321	48	1	0	1.09	78.9	14.0295	1.12	91.8	10.715	0.98	101.1	19.6702
322	49	1	0	1.26	74.6	10.4188	0.97	98.6	8.24292	0.99	93.6	7.62047
323	27	1	0	1.17	91.9	8.05025	1	107.5	7.8803	0.92	117.6	5.50104
324	35	1	0	1.7	70	9.67384	1.85	64.1	10.2863
325	38	1	0	1.16	93.1	5.67849	1.1	107.4	7.11086	1.06	123.6	5.8681
326	39	1	0	0.86	158.4	10.26	1.04	117.5	8.44993	1.08	112.5	11.1651
327	43	1	0	1.35	83.7	11.2332	1.48	77.4	9.98246	1.38	83	11.0872
328	26	1	0	0.94	155.8	7.13506	0.95	159.6	9.43597	1.05	175.7	7.15668
329	42	1	0	1.06	173	6.83888	1.08	166.3	7.70161	0.99	180.2	8.21082
330	59	1	0	1.14	88.6	13.4306	1.18	86.3	13.0598	1.22	83.7	13.8713
331	52	1	0	1.25	67.8	23.0373	1.59	51.5	23.0479	1.29	59.3	21.7943
332	47	1	0	1.27	74.3	14.9104	1.24	74.9	10.4243	1.15	82.2	14.929
333	38	1	0	0.96	120.7	7.31751	1.03	115.8	5.93533	1.01	121	7.22177
334	44	0	0	0.94	88	9.94028	1.01	80.6	8.59529	0.92	85.9	13.1055
335	41	1	0	0.96	113.7	9.21448	0.88	120	8.53564
336	46	1	0	0.97	80.1	16.271	0.89	91.3	12.1201	0.92	87.9	8.81929
337	51	0	0	0.85	93.6	8.86522	0.96	81.4	15.8498	0.81	103	9.3
338	44	1	0			10.3967			13.3066			9.67902
339	57	1	0	0.78	119	29.6626	0.88	108.2	29.1629	0.9	106	24.0532
340	38	1	0	5.08	59	2.20311	3.94	76	3.72835	3.27	71	16.9548
341	42	1	0	1.55	157.5	10.7237	1.6	155.5	9.14265	1.39	175.3	10.204
342	55	1	0	0.92	102.5	11.8957	0.84	111.3	10.9226	0.99	92.5	17.7843
343	46	1	0	1.47	76.3	23.6606	1.42	78.8	20.5011	1.33	85	12.6584
344	52	1	0	1.14	100.6	8.93947	1.14	101.2	8.76605	1.06	105.1	9.19475
345	48	1	0	1.25	121.2	5.94928	1.19	125.8	5.62038	1.16	130.3	4.98069
346	53	1	0	1.4	67.8	11.4263	1.49	66.1	13.3202	1.28	72.8	13.9587
347	26	1	0	0.97	180.9	2.83345	0.94	186.2	3.73762	1.01	178.8	4.44251
348	47	1	0	1.08	103	9.74522	1.12	97.5	9.09011	1.08	99.4	9.96135
349	33	1	0	0.96	210.2	4.33558	0.87	222.6	5.54618	0.97	200.6	5.62187
350	56	1	0	1.33	61.8	12.4115	1.37	58	8.33467	1.33	61	15.6043
351	32	1	0	1.16	97.9	6.82997	1.19	93	7.35821	1.14	94.9	9.29124
352	49	1	0	0.76	146.3	7.18544	0.78	142	7.98238	0.92	122.7	8.82578
353	42	1	0	1.31	78.8	32.1708	1.12	89	15.9102	1.37	74.1	22.1014
354	35	1	0	1.1	114	8.92918	1.03	130.1	5.04241	0.92	165.4	6.00387
355	32	1	0	1.02	163.2	3.93007	1.15	142.4	3.02006	0.92	179.2	3.06939
356	48	1	0	0.81	113.4	10.3067	0.81	111.7	9.89334	0.79	110.9	15.6646
357	36	1	0	1.31	97.8	12.44	1.44	94	11.8369	1.29	100.1	13.7985
358	43	1	0	1.21	98	8.06067	1.23	92.6	6.95314	1.29	89.5	12.5156
359	33	1	0	1.21	83.8	9.42535	1.02	102	7.45519
360	47	0	0	1.02	70.9	18.4524	0.94	77	20.1497	1.03	67.1	27.8105
361	30	1	0	1.16	141.2	11.8398	1.31	123.8	9.08687	1.11	146.5	7.34583
362	29	1	0	1.45	105.3	3.82614	1.16	127.8	3.68232	1.54	93.8	4.70076
363	52	1	0	1.19	103.3	8.95048	1.18	102	10.6058	1.07	110.5	10.9354
364	59	1	0	1.29	76	20.341	1.44	67.1	17.7663	1.27	75.6	18.0902
365	39	1	0	0.91	141.8	4.5844	1.09	114.3	4.08435	1.03	121.6	5.60706
366	50	1	0	0.99	99.1	16.3967	0.94	103.6	16.8902	0.9	100.1	16.0165
367	26	1	0	1.27	112.6	8.33332	1.33	101.2	5.87067	1.14	114.5	5.60595
368	30	1	0	1.13	126.5	3.27118	1.11	137.9	4.9287	1.03	137.3	4.49312
369	33	1	0	1.15	239.1	6.25399	1.17	241.3	5.06974			7.51017
370	51	1	0	1.28	74.3	8.6229	1.46	65.8	12.9731	1.45	66.2	12.5242
371	43	1	0	0.95	113.9	7.52928	1.07	104.4	7.60161	0.95	108.1	4.55157
372	39	1	0	1.38	80.8	8.3939	1.75	65.7	8.30521	1.27	85.3	8.97495
373	30	1	0	1.12	96.6	6.24735	1.07	103	8.66346	1.1	98.3	28.5789
374	37	1	0	1.28	77.2	12.6806	1.37	73.5	8.37234	1.08	94.2	13.5228
375	53	0	0	0.89	116.8	13.8907	0.93	107.9	14.4149	0.9	118.7	19.1255
376	44	0	0	0.7	101.4	12.6412	0.73	95.5	11.8705	0.6	117.6	10.7953
377	37	0	0	0.86	152	8.03195	1.06	124.8	11.1052	0.98	129.9	9.63147
378	51	1	0	1.15	70.9	8.08344	1.19	72.7	7.82549	1.02	87.5	8.32136
379	31	1	0	1.01	138.6	5.51538	1.13	123.9	10.0628	1.05	125.3	9.98211
380	41	1	0	1.09	106	33.4583	1.2	101.2	15.6562	1.15	110.1	11.2999
381	49	1	0	0.93	115.5	11.5159	0.9	116.7	10.3691	0.91	118.3	12.4406
382	31	1	0	1.12	95	7.31593	1.23	88.1	7.08983	1.09	100.7	7.77953
383	53	1	0	0.97	133.4	20.5893	0.8	159.3	20.4042	0.93	133.2	24.6634
384	49	0	0	0.86	100.7	8.4714	0.88	97.6	7.145	0.79	101.5	9.03197
385	36	1	0	1.6	89	5.2736	1.67	88	4.72528	1.6	92	5.40243
386	32	1	0	0.91	113.6	9.61451	0.94	102.8	9.35453	0.97	108.9	16.5518
387	30	1	0	1.02	137.8	6.00781	1.04	131.2	5.41405	1.17	119.7	6.75427
388	40	1	0	1.43	96	17.2303	1.47	94	8.73395	1.44	94	9.01169
389	39	1	0	2.8	71	7.02821	2.62	75	5.77833	2.99	67	5.57571
390	39	1	0	1.39	119	10.4612	1.43	114.4	7.70097	1.21	127.1	10.5735
391	38	1	0	1.36	74.7	7.77129	1.19	79.9	9.7775
392	44	1	0	2.31	75	6.4792	2.21	74	6.67547	2.45	70	5.16813
393	59	1	0	1.09	87.5	16.3543	1.05	83.9	13.4263	1.02	89.2	9.88349
394	51	1	0	1.5	90	8.62628	1.44	93	7.12801	1.37	95	26.9092
395	53	1	0	1.09	96	16.393				1.11	95.5	13.2834
396	58	0	0	0.72	119.5	4.10485	0.85	100.2	9.11653	0.93	87.7	9.89826
397	45	0	0	2.06	66	8.35058	2.05	66	7.08745	1.68	70	8.12199
398	39	1	0	2.07	82	9.79421	1.84	90	7.21973	1.87	89	7.95519
399	33	1	0	1.2	99.4	5.75667	1.04	118	6.66482	0.96	126.5	8.22245
400	66	0	0	0.86	74.2	16.3309	0.85	74	13.1832	0.84	70.6	23.3024
401	33	1	0	2.1	76	3.52751	2.22	73	2.9638	2.11	76	3.63788
402	54	1	0	2.18	76	11.0197	1.91	85	10.4641	1.99	83	14.3662
403	35	1	0	1.36	103	13.9494	1.4	100	9.30216	1.32	108	12.2837
404	33	0	0	1.33	60	10.7942	1.21	64	14.0116	1.09	67	10.7037
405	37	1	0	3	90	5.98908	3.42	80	6.25849	3.15	87	6.53873
406	46	1	0	1.86	88	9.88291	2.28	76	11.1064	2.03	84	15.0964
407	42	1	0	1.48	100	10.2322	1.44	100	10.6181	1.25	111	10.6186
408	48	1	0	1.3	84	10.1133	1.26	90	7.96082	1.27	85	13.6718
409	55	1	0	1.65	84	12.1105	1.61	82	15.2728	1.53	86	24.2851
410	38	1	0	1.57	117	7.98697	1.57	108	9.66487	1.49	112	9.48943
411	46	1	0	1.89	81	10.7304	1.62	95	10.9303	1.8	84	10.1998
412	60	1	0	1.41	85	12.3729	1.27	91	8.2651	1.3	87	10.8102
413	49	1	0			5.19942	1.96	81	6.96118	1.99	81	5.50526
414	31	1	0	1.83	88	8.10207	1.69	93	8.04835	1.72	91	4.64112
415	52	1	0	1.14	120	7.77478	1.07	130	7.46953	1.27	105	9.08662
416	30	1	0	1.37	93	4.73688	1.33	89	5.98968	1.12	106	6.44054
